# Supplementary material
Source: PubMed Central journal article supplement (PMC3308133)
Supplement: NIHMS362614-supplement-Supp_2.pdf [file NIHMS362614-supplement-Supp_2.pdf]

| <b>QTL</b>    | <b>Gene Name</b>                                            | <b>Gene Symbol</b> | <b>Non-Synonymous Coding SNPs</b> |
|---------------|-------------------------------------------------------------|--------------------|-----------------------------------|
| <i>BodWt1</i> | arginine vasopressin receptor 1B                            | Avpr1b             | 1                                 |
| <i>BodWt1</i> | chitinase 3-like 1                                          | Chi3l1             | 2                                 |
| <i>BodWt1</i> | ELK4, member of ETS oncogene family                         | Elk4               | 1                                 |
| <i>BodWt1</i> | ethanolamine kinase 2                                       | Etnk2              | 1                                 |
| <i>BodWt1</i> | leucine-rich repeat-containing G protein-coupled receptor 6 | Lgr6               | 1                                 |
| <i>BodWt1</i> | leiomodulin 1 (smooth muscle)                               | Lmod1              | 1                                 |
| <i>BodWt1</i> | leucine rich repeat protein 2, neuronal                     | Lrrn2              | 2                                 |
| <i>BodWt1</i> | myosin binding protein H                                    | Mybph              | 1                                 |
| <i>BodWt1</i> | neuron navigator 1                                          | Nav1               | 2                                 |
| <i>BodWt1</i> | opticin                                                     | Optc               | 1                                 |
| <i>BodWt1</i> | protein phosphatase 1, regulatory (inhibitor) subunit 12B   | Ppp1r12b           | 1                                 |
| <i>BodWt1</i> | proline arginine-rich end leucine-rich repeat               | Prelp              | 1                                 |
| <i>BodWt1</i> | protein tyrosine phosphatase, non-receptor type 7           | Ptpn7              | 1                                 |
| <i>BodWt1</i> | protein tyrosine phosphatase, receptor type, V              | Ptprv              | 1                                 |
| <i>BodWt1</i> | solute carrier family 26, member 9                          | Slc26a9            | 1                                 |
| <i>BodWt1</i> | transmembrane protein 183A                                  | Tmem183a           | 1                                 |
| <i>BodWt2</i> | RIKEN cDNA 2310021H06 gene                                  | 2310021H06Rik      | 2                                 |
| <i>BodWt2</i> | RIKEN cDNA 4921517L17 gene                                  | 4921517L17Rik      | 3                                 |
| <i>BodWt2</i> | RIKEN cDNA 6430550D23 gene                                  | 6430550D23Rik      | 4                                 |
| <i>BodWt2</i> | cDNA sequence BC018465                                      | BC018465           | 5                                 |
| <i>BodWt2</i> | bactericidal/permeability-increasing protein-like 1         | Bpil1              | 2                                 |
| <i>BodWt2</i> | bactericidal/permeability-increasing protein-like 3         | Bpil3              | 3                                 |
| <i>BodWt2</i> | centrosomal protein 250                                     | Cep250             | 18                                |
| <i>BodWt2</i> | copine I                                                    | Cpne1              | 2                                 |
| <i>BodWt2</i> | ER degradation enhancer, mannosidase alpha-like 2           | Edem2              | 2                                 |
| <i>BodWt2</i> | erythrocyte protein band 4.1-like 1                         | Epb4.1l1           | 5                                 |
| <i>BodWt2</i> | family with sequence similarity 83, member C                | Fam83c             | 4                                 |
| <i>BodWt2</i> | fer-1-like 4 (C. elegans)                                   | Fer1l4             | 13                                |
| <i>BodWt2</i> | growth differentiation factor 5                             | Gdf5               | 1                                 |
| <i>BodWt2</i> | gamma-glutamyltransferase 7                                 | Ggt7               | 2                                 |
| <i>BodWt2</i> | predicted gene 5840                                         | Gm5840             | 6                                 |
| <i>BodWt2</i> | myosin, heavy chain 7B, cardiac muscle, beta                | Myh7b              | 1                                 |
| <i>BodWt2</i> | nuclear receptor coactivator 6                              | Ncoa6              | 3                                 |
| <i>BodWt2</i> | nitrogen fixation gene 1                                    | Nfs1               | 1                                 |
| <i>BodWt2</i> | PHD finger protein 20                                       | Phf20              | 2                                 |
| <i>BodWt2</i> | protein C receptor, endothelial                             | Procr              | 2                                 |

| QTL            | Gene Name                                                                               | Symbol        | Non-Synonymous Coding SNPs |
|----------------|-----------------------------------------------------------------------------------------|---------------|----------------------------|
| <i>BodWt2</i>  | parotid secretory protein                                                               | Psp           | 7                          |
| <i>BodWt2</i>  | hnRNP-associated with lethal yellow                                                     | Raly          | 1                          |
| <i>BodWt2</i>  | RNA binding motif protein 12                                                            | Rbm12         | 2                          |
| <i>BodWt2</i>  | antimicrobial peptide RYA3                                                              | Rya3          | 3                          |
| <i>BodWt2</i>  | SCAN domain-containing 1                                                                | Scand1        | 1                          |
| <i>BodWt2</i>  | syntrophin, acidic 1                                                                    | Snta1         | 1                          |
| <i>BodWt2</i>  | cDNA sequence U46068                                                                    | U46068        | 5                          |
| <i>BodWt2</i>  | ubiquinol-cytochrome c reductase complex chaperone, CBP3 homolog (yeast)                | Uqcc          | 1                          |
| <i>BodWt2</i>  | zinc finger protein 341                                                                 | Zfp341        | 1                          |
| <i>BodWt4</i>  | <b>RAD23b homolog (<i>S. cerevisiae</i>)</b>                                            | <b>Rad23b</b> | <b>1</b>                   |
| <i>BodWt6b</i> | RIKEN cDNA 5730419I09 gene                                                              | 5730419I09Rik | 1                          |
| <i>BodWt6b</i> | predicted gene 766                                                                      | Gm766         | 2                          |
| <i>BodWt7</i>  | cDNA sequence BC051019                                                                  | BC051019      | 1                          |
| <i>BodWt7</i>  | BTB (POZ) domain containing 10                                                          | Btbd10        | 1                          |
| <i>BodWt7</i>  | cytochrome b5 reductase 2                                                               | Cyb5r2        | 3                          |
| <i>BodWt7</i>  | dickkopf homolog 3 ( <i>Xenopus laevis</i> )                                            | Dkk3          | 2                          |
| <i>BodWt7</i>  | eukaryotic translation initiation factor 3, subunit F                                   | Eif3f         | 2                          |
| <i>BodWt7</i>  | UDP-N-acetyl-alpha-D-galactosamine:polypeptide N-acetylgalactosaminyltransferase-like 4 | Galntl4       | 1                          |
| <i>BodWt7</i>  | lymphatic vessel endothelial hyaluronan receptor 1                                      | Lyve1         | 2                          |
| <i>BodWt7</i>  | microtubule associated monoxygenase, calponin and LIM domain containing 2               | Mical2        | 4                          |
| <i>BodWt7</i>  | MICAL C-terminal like                                                                   | Micalcl       | 5                          |
| <i>BodWt7</i>  | MRV integration site 1                                                                  | Mrvi1         | 6                          |
| <i>BodWt7</i>  | olfactory receptor 470                                                                  | Olfr470       | 1                          |
| <i>BodWt7</i>  | olfactory receptor 473                                                                  | Olfr473       | 1                          |
| <i>BodWt7</i>  | olfactory receptor 474                                                                  | Olfr474       | 3                          |
| <i>BodWt7</i>  | olfactory receptor 476                                                                  | Olfr476       | 2                          |
| <i>BodWt7</i>  | olfactory receptor 477                                                                  | Olfr477       | 1                          |
| <i>BodWt7</i>  | olfactory receptor 478                                                                  | Olfr478       | 1                          |
| <i>BodWt7</i>  | olfactory receptor 479                                                                  | Olfr479       | 2                          |
| <i>BodWt7</i>  | olfactory receptor 480                                                                  | Olfr480       | 3                          |
| <i>BodWt7</i>  | olfactory receptor 483                                                                  | Olfr483       | 1                          |
| <i>BodWt7</i>  | olfactory receptor 484                                                                  | Olfr484       | 2                          |
| <i>BodWt7</i>  | olfactory receptor 488                                                                  | Olfr488       | 1                          |
| <i>BodWt7</i>  | olfactory receptor 490                                                                  | Olfr490       | 1                          |
| <i>BodWt7</i>  | olfactory receptor 491                                                                  | Olfr491       | 1                          |

| QTL           | Gene Name                                                         | Symbol       | Non-Synonymous Coding SNPs |
|---------------|-------------------------------------------------------------------|--------------|----------------------------|
| <i>BodWt7</i> | olfactory receptor 492                                            | Olfr492      | 4                          |
| <i>BodWt7</i> | olfactory receptor 493                                            | Olfr493      | 1                          |
| <i>BodWt7</i> | olfactory receptor 494                                            | Olfr494      | 8                          |
| <i>BodWt7</i> | olfactory receptor 495                                            | Olfr495      | 2                          |
| <i>BodWt7</i> | olfactory receptor 497                                            | Olfr497      | 3                          |
| <i>BodWt7</i> | olfactory receptor 498                                            | Olfr498      | 2                          |
| <i>BodWt7</i> | olfactory receptor 502                                            | Olfr502      | 2                          |
| <i>BodWt7</i> | olfactory receptor 503                                            | Olfr503      | 3                          |
| <i>BodWt7</i> | olfactory receptor 504                                            | Olfr504      | 8                          |
| <i>BodWt7</i> | olfactory receptor 506                                            | Olfr506      | 1                          |
| <i>BodWt7</i> | olfactory receptor 507                                            | Olfr507      | 2                          |
| <i>BodWt7</i> | olfactory receptor 508                                            | Olfr508      | 2                          |
| <i>BodWt7</i> | olfactory receptor 510                                            | Olfr510      | 2                          |
| <i>BodWt7</i> | olfactory receptor 512                                            | Olfr512      | 2                          |
| <i>BodWt7</i> | olfactory receptor 513                                            | Olfr513      | 2                          |
| <i>BodWt7</i> | olfactory receptor 514                                            | Olfr514      | 2                          |
| <i>BodWt7</i> | olfactory receptor 516                                            | Olfr516      | 1                          |
| <i>BodWt7</i> | olfactory receptor 517                                            | Olfr517      | 1                          |
| <i>BodWt7</i> | olfactory receptor 518                                            | Olfr518      | 2                          |
| <i>BodWt7</i> | olfactory receptor 519                                            | Olfr519      | 2                          |
| <i>BodWt7</i> | ovochymase 2                                                      | Ovch2        | 11                         |
| <i>BodWt7</i> | PTPRF interacting protein, binding protein 2 (liprin beta 2)      | Ppfibp2      | 3                          |
| <i>BodWt7</i> | resistance to inhibitors of cholinesterase 3 homolog (C. elegans) | Ric3         | 1                          |
| <i>BodWt7</i> | SET binding factor 2                                              | Sbf2         | 5                          |
| <i>BodWt7</i> | signal peptide, CUB domain, EGF-like 2                            | Scube2       | 1                          |
| <i>BodWt7</i> | suppression of tumorigenicity 5                                   | St5          | 1                          |
| <i>BodWt7</i> | <b>serine/threonine kinase 33</b>                                 | <b>Stk33</b> | <b>1</b>                   |
| <i>BodWt7</i> | SWA-70 protein                                                    | Swap70       | 3                          |
| <i>BodWt7</i> | tripartite motif-containing 66                                    | Trim66       | 6                          |
| <i>BodWt8</i> | acyl-CoA synthetase long-chain family member 1                    | Acs11        | 1                          |
| <i>BodWt8</i> | dual specificity phosphatase 4                                    | Dusp4        | 1                          |
| <i>BodWt8</i> | myeloid leukemia factor 1 interacting protein                     | Mlf1ip       | 1                          |
| <i>BodWt8</i> | mitochondrial tumor suppressor 1                                  | Mtus1        | 1                          |
| <i>BodWt8</i> | platelet-derived growth factor receptor-like                      | Pdgfrl       | 1                          |
| <i>BodWt8</i> | sarcoglycan zeta                                                  | Sgcz         | 1                          |
| <i>BodWt8</i> | transmembrane protein 66                                          | Tmem66       | 1                          |
| <i>BodWt8</i> | zinc finger, DHHC domain containing 2                             | Zdhhc2       | 1                          |
| <i>BodWt8</i> | zinc finger protein 353                                           | Zfp353       | 1                          |

| QTL            | Gene Name                                                            | Symbol        | Non-Synonymous Coding SNPs |
|----------------|----------------------------------------------------------------------|---------------|----------------------------|
| <i>BodWt9</i>  | family with sequence similarity 55, member B                         | Fam55b        | 3                          |
| <i>BodWt9</i>  | family with sequence similarity 55, member D                         | Fam55d        | 1                          |
| <i>BodWt9</i>  | predicted gene 4894                                                  | Gm4894        | 1                          |
| <i>BodWt9</i>  | predicted gene 5617                                                  | Gm5617        | 1                          |
| <i>BodWt10</i> | RIKEN cDNA 4930547N16 gene                                           | 4930547N16Rik | 2                          |
| <i>BodWt10</i> | ARP6 actin-related protein 6 homolog (yeast)                         | Actr6         | 2                          |
| <i>BodWt10</i> | <b>ankyrin repeat and sterile alpha motif domain containing 1B</b>   | <b>Anks1b</b> | <b>1</b>                   |
| <i>BodWt10</i> | cyclin-dependent kinase 17                                           | Cdk17         | 1                          |
| <i>BodWt10</i> | ELK3, member of ETS oncogene family                                  | Elk3          | 3                          |
| <i>BodWt10</i> | N-acetylglucosamine-1-phosphate transferase, alpha and beta subunits | Gnptab        | 6                          |
| <i>BodWt10</i> | nuclear receptor subfamily 1, group H, member 4                      | Nr1h4         | 4                          |
| <i>BodWt10</i> | solute carrier family 17, member 8                                   | Slc17a8       | 2                          |
| <i>BodWt10</i> | UHRF1 (ICBP90) binding protein 1-like                                | Uhrf1bp1l     | 2                          |
| <i>BodWt10</i> | UTP20, small subunit (SSU) processome component, homolog             | Utp20         | 2                          |
| <i>BodWt11</i> | ATP-binding cassette, sub-family C (CFTR/MRP), member 3              | Abcc3         | 5                          |
| <i>BodWt11</i> | acyl-CoA synthetase family member 2                                  | Acsf2         | 1                          |
| <i>BodWt11</i> | ankyrin repeat domain 40                                             | Ankrd40       | 1                          |
| <i>BodWt11</i> | beta-1,4-N-acetyl-galactosaminyl transferase 2                       | B4galnt2      | 1                          |
| <i>BodWt11</i> | calcium channel, voltage-dependent, T type, alpha 1G subunit         | Cacna1g       | 2                          |
| <i>BodWt11</i> | CDK5 regulatory subunit associated protein 3                         | Cdk5rap3      | 3                          |
| <i>BodWt11</i> | distal-less homeobox 4                                               | Dlx4          | 1                          |
| <i>BodWt11</i> | essential meiotic endonuclease 1 homolog 1                           | Eme1          | 4                          |
| <i>BodWt11</i> | epsin 3                                                              | Epn3          | 2                          |
| <i>BodWt11</i> | gastric inhibitory polypeptide                                       | Gip           | 1                          |
| <i>BodWt11</i> | predicted gene 11541                                                 | Gm11541       | 1                          |
| <i>BodWt11</i> | predicted gene 11545                                                 | Gm11545       | 1                          |
| <i>BodWt11</i> | histone H1-like protein in spermatids 1                              | Hils1         | 1                          |
| <i>BodWt11</i> | leucine rich repeat containing 46                                    | Lrrc46        | 2                          |
| <i>BodWt11</i> | mitochondrial ribosomal protein L10                                  | Mrpl10        | 2                          |
| <i>BodWt11</i> | MYCBP associated protein                                             | Mycbpap       | 1                          |
| <i>BodWt11</i> | nerve growth factor receptor (TNFR superfamily, member 16)           | Ngfr          | 1                          |
| <i>BodWt11</i> | oxysterol binding protein-like 7                                     | Osbpl7        | 1                          |
| <i>BodWt11</i> | pyridoxine 5'-phosphate oxidase                                      | Pnpo          | 1                          |
| <i>BodWt11</i> | radical S-adenosyl methionine domain containing 1                    | Rsad1         | 1                          |

| <b>QTL</b>     | <b>Gene Name</b>                                                              | <b>Symbol</b> | <b>Non-Synonymous Coding SNPs</b> |
|----------------|-------------------------------------------------------------------------------|---------------|-----------------------------------|
| <i>BodWt11</i> | secernin 2                                                                    | Scrn2         | 2                                 |
| <i>BodWt11</i> | sarcoglycan, alpha (dystrophin-associated glycoprotein)                       | Sgca          | 1                                 |
| <i>BodWt11</i> | src family associated phosphoprotein 1                                        | Skap1         | 4                                 |
| <i>BodWt11</i> | sorting nexin 11                                                              | Snx11         | 2                                 |
| <i>BodWt11</i> | sperm associated antigen 9                                                    | Spag9         | 2                                 |
| <i>BodWt11</i> | spermatogenesis associated 20                                                 | Spata20       | 3                                 |
| <i>BodWt11</i> | Tmem92-ps transmembrane protein 92, pseudogene                                | Tmem92-ps     | 1                                 |
| <i>BodWt11</i> | ubiquitin-conjugating enzyme E2Z                                              | Ube2z         | 1                                 |
| <i>BodWt11</i> | UTP18, small subunit (SSU) processome component                               | Utp18         | 2                                 |
| <i>BodWt11</i> | WAP, follistatin/kazal, immunoglobulin, kunitz and netrin domain containing 2 | Wfikkn2       | 1                                 |
| <i>BodWt14</i> | protocadherin 20                                                              | Pcdh20        | 2                                 |
| <i>BodWt14</i> | protocadherin 9                                                               | Pcdh9         | 1                                 |
